# Supplementary material for: Development of a checklist for people communicating evidence-based information about the effects of healthcare interventions: a mixed methods study
Source: PubMed Central journal article supplement — BMJ Open. 2020 Jul 21;10(7):e036348. doi: 10.1136/bmjopen-2019-036348 (PMC7375421; doi:10.1136/bmjopen-2019-036348), 2020-07-21
Supplement: bmjopen-2019-036348supp001.pdf [file bmjopen-2019-036348supp001.pdf]

**Additional file 1:****Feedback on the CIHC guidance for preparing evidence-based information about the effects of interventions**

---

**Name:**

---

**1. Are recommendations included that should not be?**

No

Uncertain

Yes

If yes or uncertain, which ones and why?

---

---

**2. Are there important recommendations that are missing?**

No

Uncertain

Yes

If yes or uncertain, which concepts are missing?

---

---

**3. Are the recommendations organised in a logical way?**

No

Uncertain

Yes

If no, what suggestions do you have for changes in how the concepts are organised?

---

---

**4. Are there systematic reviews or other research that we should consider, which are not referenced?**

No

Uncertain

Yes

If yes, can you list them?

---

---

**5. How might the checklist, flow chart and (planned) video be made more understandable/helpful for people preparing information?***Use next page if you need more space***6. Please include any other comments you have.***Use next page if you need more space*
